# Supplementary material
Source: Springer Nature journal article supplement (https://www.springerprofessional.de/resource/supplementary/13638_2012_702_MOESM5_ESM.pdf/11898718)

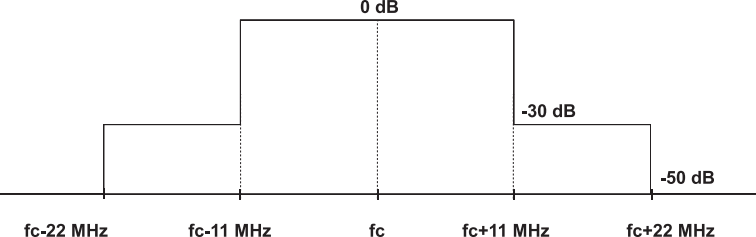

Supplement: MOESM5 [file 11898718]
